# Supplementary material
Source: publisher figshare collection journal article supplement (https://acs.figshare.com/ndownloader/files/4404265)
Supplement: Supplementary file 1 [file 4404265]

## Supporting Information:

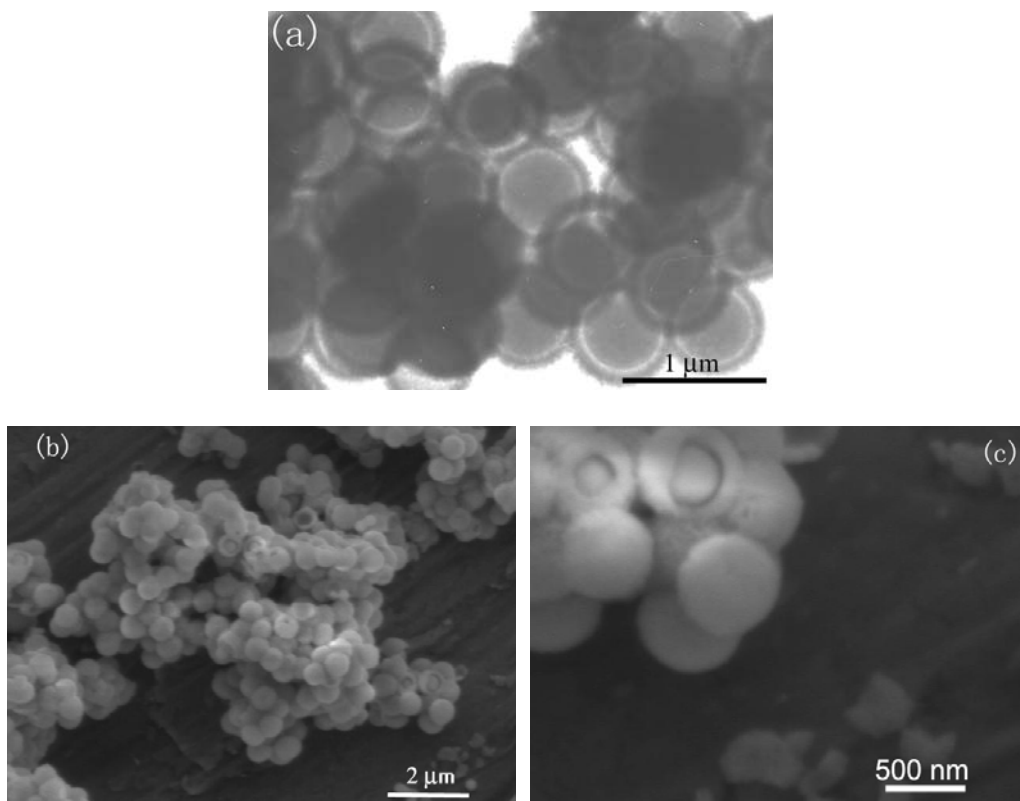

**Figure S1.** a) TEM and b-c) SEM images of silica-nickel silicate core-shell spheres, the broken silica-nickel silicate core-shell spheres can be seen clearly from c) image.

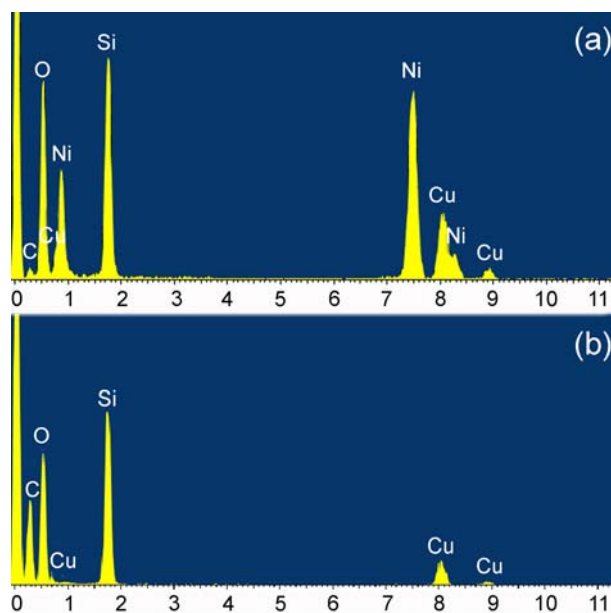

**Figure S2.** EDX spectra of a) nickel silicate hollow spheres and b) porous silica hollow spheres.

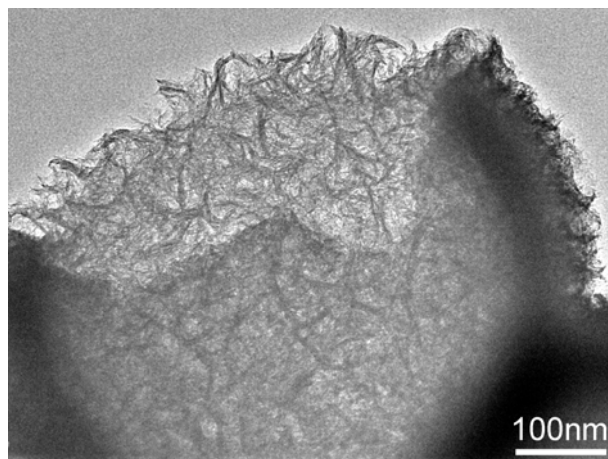

**Figure S3.** TEM image of a broken porous nickel silicate hollow sphere.

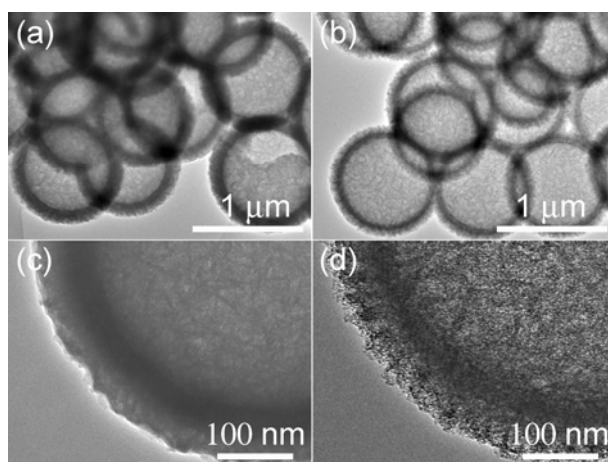

**Figure S4.** TEM images of (a) and (c) porous nickel silicate hollow spheres prepared from 800 nm silica colloidal spheres as template in nickel and ammonia solution (5 mmol  $\text{Ni}(\text{SO}_4)_2$  and 10 mL  $\text{NH}_3 \cdot \text{H}_2\text{O}$ ); (b) and (d) porous silica hollow spheres prepared by reducing from the above nickel silicate hollow spheres.

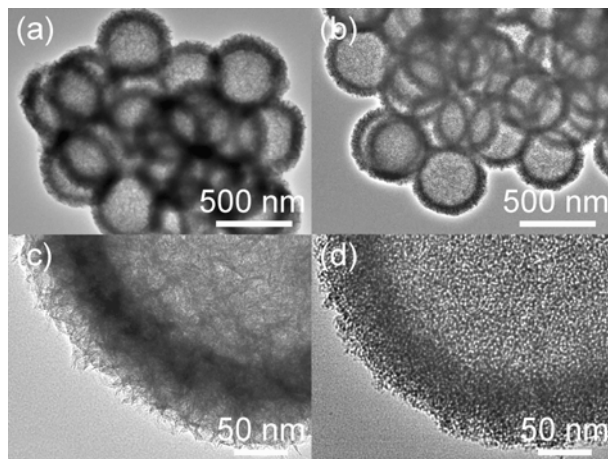

**Figure S5.** TEM images of (a) and (c) porous nickel silicate hollow spheres prepared from 400 nm silica colloidal spheres as template in nickel ions and ammonia solution (7.5 mmol  $\text{Ni}(\text{SO}_4)_2$  and 10 mL  $\text{NH}_3 \cdot \text{H}_2\text{O}$ ); (b) and (d) porous silica hollow spheres prepared by reducing from the above nickel silicate hollow spheres.

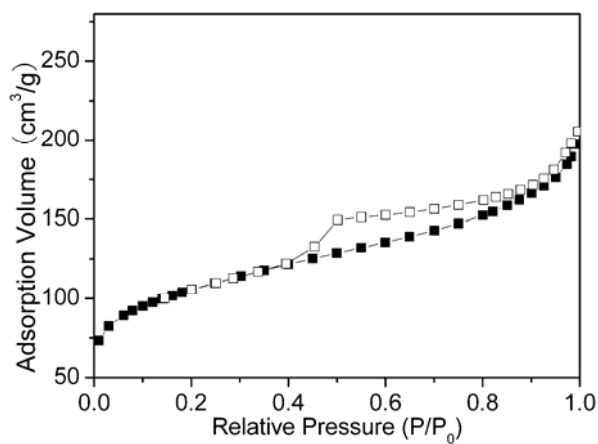

**Figure S6.** Nitrogen adsorption/desorption isotherm of the porous nickel silicate hollow spheres

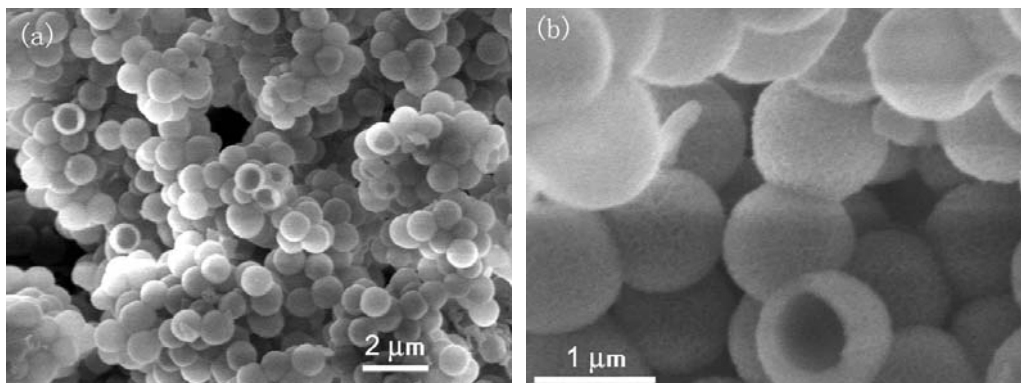

**Figure S7.** a) and b) SEM images of silica hollow spheres, the broken silica hollow spheres can be seen clearly from b) image.

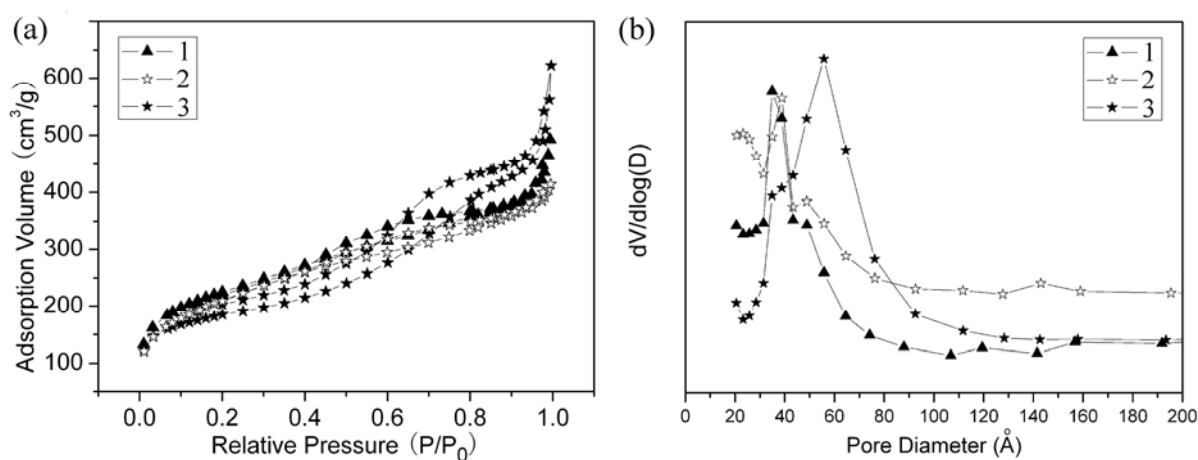

**Figure S8.** Porous silica hollow spheres obtained after treated in hydrochloric solution with different concentrations: (1) 4 M; (2) 2 M; (3) 1 M; a) Nitrogen adsorption/desorption isotherm and b) pore-size distribution curves obtained from the corresponding desorption data.
